# Supplementary material for: The Psychological Impact of In Vitro Fertilization (IVF): A Gender Systematic Review
Source: MDPI journal article supplement (doi:10.3390/healthcare14030375), 2026-02-02
Supplement: s1 [file healthcare-4087686-supplementary.pdf › healthcare-4087686-supplementary.pdf]

## Supplementary Tables

**Table S1. Detailed EMBASE search strategy and results**

| Search | Query                                                                                                                                                                                                                                                                                                                                                                          | Results  |
|--------|--------------------------------------------------------------------------------------------------------------------------------------------------------------------------------------------------------------------------------------------------------------------------------------------------------------------------------------------------------------------------------|----------|
| #1     | 'fertilization in vitro'/exp OR 'intracytoplasmic sperm injection'/exp                                                                                                                                                                                                                                                                                                         | 38798    |
| #2     | 'fertilization in vitro':ab,ti OR 'in vitro fertilization':ab,ti OR 'test-tube fertilization':ab,ti OR (fertilization NEAR/3 'test tube'):ab,ti OR 'test-tube baby':ab,ti OR (bab* NEAR/3 'test tube'):ab,ti OR 'test tube babies':ab,ti OR (sperm:ab,ti AND (injection NEAR/3 intracytoplasmic):ab,ti) OR ivf:ab,ti OR 'intracytoplasmic sperm injection':ab,ti OR icsi:ab,ti | 38754    |
| #3     | #1 OR #2                                                                                                                                                                                                                                                                                                                                                                       | 69789    |
| #4     | 'psychology'/exp OR 'anxiety'/exp OR 'depression'/exp OR 'emotions'/exp OR 'psychological stress'/exp                                                                                                                                                                                                                                                                          | 564235   |
| #5     | ('side effect' NEAR/3 psychological):ab,ti OR 'psychological side effect':ab,ti OR anxiet*:ab,ti OR depressi*:ab,ti OR emotion*:ab,ti OR distress*:ab,ti OR 'psychological stresses':ab,ti OR stress*:ab,ti OR (stress* NEAR/3 psychologic*):ab,ti OR 'mental suffering':ab,ti OR 'emotional stress':ab,ti OR psychosocial:ab,ti OR psycholog*:ab,ti                           | 2459853  |
| #6     | #4 OR #5                                                                                                                                                                                                                                                                                                                                                                       | 3024088  |
| #7     | 'infertility'/exp                                                                                                                                                                                                                                                                                                                                                              | 943177   |
| #8     | 'sterility reproductive':ab,ti OR sterility:ab,ti OR 'reproductive sterility':ab,ti OR 'sub-fertility':ab,ti OR subfertility:ab,ti OR infertil*:ab,ti                                                                                                                                                                                                                          | 54084    |
| #9     | #7 OR #8                                                                                                                                                                                                                                                                                                                                                                       | 78117    |
| #10    | #3 AND #6 AND #9                                                                                                                                                                                                                                                                                                                                                               | 814      |
| #11    | 'randomized controlled trial'/exp OR 'controlled clinical trial'/exp OR random*:ab,ti OR placebo:ab,ti OR trial:ab,ti                                                                                                                                                                                                                                                          | 917735   |
| #12    | #10 NOT #11                                                                                                                                                                                                                                                                                                                                                                    | 811      |
| #13    | 'animal'/exp NOT 'human'/exp                                                                                                                                                                                                                                                                                                                                                   | 4289942  |
| #14    | #12 NOT #13                                                                                                                                                                                                                                                                                                                                                                    | 713      |
| #15    | [2000–2023]/py                                                                                                                                                                                                                                                                                                                                                                 | 11586978 |
| #16    | #14 AND #15                                                                                                                                                                                                                                                                                                                                                                    | 525      |
| #17    | english:la                                                                                                                                                                                                                                                                                                                                                                     | 25484863 |
| #18    | #16 AND #17                                                                                                                                                                                                                                                                                                                                                                    | 479      |
| #19    | (man AND woman) OR (men AND women)                                                                                                                                                                                                                                                                                                                                             | 115      |
| #20    | #18 AND #19                                                                                                                                                                                                                                                                                                                                                                    | 79       |

**Table S2. Detailed PubMed search strategy and results**

| Search | Query                                                                                                                                                                                                                                                                                                                                                                                                                                                                                                                                                                                                                                                                                                                                                                                                               | Results      |
|--------|---------------------------------------------------------------------------------------------------------------------------------------------------------------------------------------------------------------------------------------------------------------------------------------------------------------------------------------------------------------------------------------------------------------------------------------------------------------------------------------------------------------------------------------------------------------------------------------------------------------------------------------------------------------------------------------------------------------------------------------------------------------------------------------------------------------------|--------------|
| #1     | "fertilization in vitro"[MeSH Terms] OR "sperm injections, intracytoplasmic"[MeSH Terms]                                                                                                                                                                                                                                                                                                                                                                                                                                                                                                                                                                                                                                                                                                                            | 40801        |
| #2     | ((((((((((((Fertilization* in Vitro[Title/Abstract]) OR In Vitro Fertilization*[Title/Abstract]) OR Test-Tube Fertilization*[Title/Abstract]) OR (Fertilizations [Title/Abstract] AND Test-Tube[Title/Abstract])) OR (Fertilization* [Title/Abstract] AND Test-Tube[Title/Abstract])) OR Test Tube Fertilization*[Title/Abstract]) OR Test-Tube Bab*[Title/Abstract]) OR (Bab* [Title/Abstract] AND Test-Tube[Title/Abstract])) OR Test Tube Babies[Title/Abstract]) OR (Sperm Injection* [Title/Abstract] AND Intracytoplasmic [Title/Abstract]) OR IVF[Title/Abstract]) OR (Injection* [Title/Abstract] AND Intracytoplasmic Sperm [Title/Abstract])) OR Intracytoplasmic Sperm Injection*[Title/Abstract]) OR (Injections [Title/Abstract] AND Sperm Intracytoplasmic [Title/Abstract])) OR ICSI[Title/Abstract] | 10537        |
| #3     | #1 OR #2                                                                                                                                                                                                                                                                                                                                                                                                                                                                                                                                                                                                                                                                                                                                                                                                            | 44040        |
| #4     | ((((Psychology[MeSH Terms]) OR Anxiety[MeSH Terms]) OR Depression[MeSH Terms]) OR Emotions[MeSH Terms] OR Stress, Psychological[MeSH Terms]                                                                                                                                                                                                                                                                                                                                                                                                                                                                                                                                                                                                                                                                         | 675549       |
| #5     | ((((((((((((((((Side Effect * [Title/Abstract] AND Psychological [Title/Abstract])) OR Psychological Side Effect* [Title/Abstract]) OR Anxiet* [Title/Abstract]) OR Depressi* [Title/Abstract]) OR Emotion* [Title/Abstract]) OR Distress* [Title/Abstract]) OR Psychological Stresses[Title/Abstract]) OR Stress* [Title/Abstract]) OR (Stress* [Title/Abstract] AND Psychologic* [Title/Abstract])) OR Psychologic* Stress* [Title/Abstract]) OR (Stress* [Title/Abstract] AND Life[Title/Abstract])) OR Mental Suffering[Title/Abstract]) OR (Suffering[Title/Abstract] AND Mental[Title/Abstract])) OR Suffering[Title/Abstract]) OR Emotional Stress[Title/Abstract]) OR (Stress [Title/Abstract] AND Emotional[Title/Abstract])) OR psychosocial[Title/Abstract]) OR psycholog* [Title/Abstract]              | 489164       |
| #6     | #4 OR #5                                                                                                                                                                                                                                                                                                                                                                                                                                                                                                                                                                                                                                                                                                                                                                                                            | 1015806      |
| #7     | Infertility[MeSH Terms]                                                                                                                                                                                                                                                                                                                                                                                                                                                                                                                                                                                                                                                                                                                                                                                             | 73417        |
| #8     | (((((Sterility [Title/Abstract] AND Reproductive [Title/Abstract])) OR Sterility[Title/Abstract]) OR Reproductive Sterility[Title/Abstract]) OR Sub-Fertility[Title/Abstract]) OR Subfertility[Title/Abstract]) OR Infertil* [Title/Abstract]                                                                                                                                                                                                                                                                                                                                                                                                                                                                                                                                                                       | 96394        |
| #9     | #7 OR #8                                                                                                                                                                                                                                                                                                                                                                                                                                                                                                                                                                                                                                                                                                                                                                                                            | 123472       |
| #10    | #3 AND #6                                                                                                                                                                                                                                                                                                                                                                                                                                                                                                                                                                                                                                                                                                                                                                                                           | 1021         |
| #11    | ((((((("randomized controlled trial"[Publication Type]) OR "controlled clinical trial"[Publication Type]) OR "ramdomized"[Title/Abstract]) OR "ramdomised"[Title/Abstract]) OR "placebo"[Title/Abstract]) OR "sham"[Title/Abstract]) OR "randomly"[Title/Abstract]) OR "trial"[Title/Abstract])                                                                                                                                                                                                                                                                                                                                                                                                                                                                                                                     | 1540460      |
| #12    | #10 NOT #11                                                                                                                                                                                                                                                                                                                                                                                                                                                                                                                                                                                                                                                                                                                                                                                                         | 910          |
| #13    | (animals[MeSH Terms] NOT (humans[MeSH Terms] AND animals[MeSH Terms]))                                                                                                                                                                                                                                                                                                                                                                                                                                                                                                                                                                                                                                                                                                                                              | 5123697      |
| #14    | #12 NOT #13                                                                                                                                                                                                                                                                                                                                                                                                                                                                                                                                                                                                                                                                                                                                                                                                         | 901          |
| #15    | ("2000"[Date - Publication] : "3000"[Date - Publication])                                                                                                                                                                                                                                                                                                                                                                                                                                                                                                                                                                                                                                                                                                                                                           | 2218838<br>1 |
| #16    | #14 AND #15                                                                                                                                                                                                                                                                                                                                                                                                                                                                                                                                                                                                                                                                                                                                                                                                         | 640          |
| #17    | English[Language]                                                                                                                                                                                                                                                                                                                                                                                                                                                                                                                                                                                                                                                                                                                                                                                                   | 3092835<br>6 |
| #18    | #16 AND #17                                                                                                                                                                                                                                                                                                                                                                                                                                                                                                                                                                                                                                                                                                                                                                                                         | 591          |
| #19    | ((((man) AND (woman)) OR (men)) AND (women))                                                                                                                                                                                                                                                                                                                                                                                                                                                                                                                                                                                                                                                                                                                                                                        | 361416       |
| #20    | #18 AND #19                                                                                                                                                                                                                                                                                                                                                                                                                                                                                                                                                                                                                                                                                                                                                                                                         | 66           |

**Table S3. Detailed PsycINFO search strategy and results**

| Search | Query                                                                                                                                                                                                                                                                                                                                                                                                                                                              | Results |
|--------|--------------------------------------------------------------------------------------------------------------------------------------------------------------------------------------------------------------------------------------------------------------------------------------------------------------------------------------------------------------------------------------------------------------------------------------------------------------------|---------|
| #1     | MJSUB.EXACT.EXPLODE("Infertility")                                                                                                                                                                                                                                                                                                                                                                                                                                 | 1545    |
| #2     | ti(sterility NEAR/3 reproductive) OR ti(Sterility) OR ti("Reproductive Sterility") OR ti(Subfertility) OR ti(Sub-Fertility) OR ti(Infertil*)                                                                                                                                                                                                                                                                                                                       | 1243    |
| #3     | ab(sterility NEAR/3 reproductive) OR ab(Sterility) OR ab("Reproductive Sterility") OR ab(Subfertility) OR ab(Sub-Fertility) OR ab(Infertil*)                                                                                                                                                                                                                                                                                                                       | 2713    |
| #4     | #1 OR #2 OR #3                                                                                                                                                                                                                                                                                                                                                                                                                                                     | 2969    |
| #5     | MJSUB.EXACT.EXPLODE("Reproductive Technology")                                                                                                                                                                                                                                                                                                                                                                                                                     | 1225    |
| #6     | ti(Fertilization* in Vitro ) OR ti((In Vitro Fertilization* OR IVF)) OR ti((Test-Tube Fertilization* OR Injection* NEAR/3 Intracytoplasmic Sperm )) OR ti(( Intracytoplasmic Sperm Injection* OR Injections AND Sperm NEAR/3 Intracytoplasmic )) OR ti((Fertilization* NEAR/3 Test-Tube OR ICSI )) OR ti(Test Tube Fertilization* ) OR ti(Test-Tube Bab* ) OR ti(Bab* NEAR/3 Test-Tube ) OR ti(Test Tube Babies ) OR ti(Sperm Injection* NEAR/3 Intracytoplasmic ) | 241     |
| #7     | ab(Fertilization* in Vitro) OR ab((In Vitro Fertilization* OR IVF)) OR ab((Test-Tube Fertilization* OR Injection* NEAR/3 Intracytoplasmic Sperm )) OR ab(( Intracytoplasmic Sperm Injection* OR Injections NEAR/3 Sperm NEAR/3 Intracytoplasmic )) OR ab((Fertilization* NEAR/3 Test-Tube OR ICSI )) OR ab(Test Tube Fertilization*) OR ab(Test-Tube Bab*) OR ab(Bab* NEAR/3 Test-Tube) OR ab(Test Tube Babies) OR ab(Sperm Injection* NEAR/3 Intracytoplasmic)    | 617     |
| # 8    | #5 OR #6 OR #7                                                                                                                                                                                                                                                                                                                                                                                                                                                     | 1432    |
| #9     | MJSUB.EXACT.EXPLODE("Clinical Psychology")                                                                                                                                                                                                                                                                                                                                                                                                                         | 6184    |
| #10    | MJSUB.EXACT.EXPLODE("Anxiety")                                                                                                                                                                                                                                                                                                                                                                                                                                     | 41101   |
| #11    | MJSUB.EXACT.EXPLODE("Depression (Emotion)")                                                                                                                                                                                                                                                                                                                                                                                                                        | 18154   |
| #12    | MJSUB.EXACT.EXPLODE("Emotions")                                                                                                                                                                                                                                                                                                                                                                                                                                    | 194940  |
| #13    | MJSUB.EXACT.EXPLODE("Psychological Stress")                                                                                                                                                                                                                                                                                                                                                                                                                        | 6223    |
| #14    | ti(Anxiet* ) OR ti(Depressi* ) OR ti(Emotion* ) OR ti(Distress* ) OR ti(Stress* ) OR ti(Suffering ) OR ti(psychosocial ) OR ti(psycholog* )                                                                                                                                                                                                                                                                                                                        | 388452  |
| #15    | ab(Anxiet*) OR ab(Depressi*) OR ab(Emotion*) OR ab(Distress*) OR ab(Stress*) OR ab(Suffering) OR ab(psychosocial) OR ab(psycholog*)                                                                                                                                                                                                                                                                                                                                | 970789  |
| #16    | #9 OR #10 OR #11 OR #12 OR #13 OR #14 OR #15                                                                                                                                                                                                                                                                                                                                                                                                                       | 1038956 |
| #17    | #4 AND #8 AND #16                                                                                                                                                                                                                                                                                                                                                                                                                                                  | 298     |
| #18    | MJSUB.EXACT("Random Sampling")                                                                                                                                                                                                                                                                                                                                                                                                                                     | 183     |
| #19    | MJSUB.EXACT("Clinical Trials")                                                                                                                                                                                                                                                                                                                                                                                                                                     | 702     |
| #20    | ti(placebo ) OR ti(trial) OR ti( random* )                                                                                                                                                                                                                                                                                                                                                                                                                         | 35244   |
| #21    | ab(placebo) OR ab(trial) OR ab(random*)                                                                                                                                                                                                                                                                                                                                                                                                                            | 242150  |
| #22    | #18 OR #19 OR #20 OR #21                                                                                                                                                                                                                                                                                                                                                                                                                                           | 247282  |
| #23    | #17 NOT #22                                                                                                                                                                                                                                                                                                                                                                                                                                                        | 254     |
| #24    | PY=2000-2023                                                                                                                                                                                                                                                                                                                                                                                                                                                       | 171     |

**Table S4. Detailed Scopus search strategy and results**

| <b>Search</b> | <b>Query</b>                                                                                                                                                                                 | <b>Results</b> |
|---------------|----------------------------------------------------------------------------------------------------------------------------------------------------------------------------------------------|----------------|
| #1            | TITLE-ABS-KEY("in vitro fertilization" OR IVF OR "test tube fertilization" OR "test tube baby" OR "test tube babies" OR "intracytoplasmic sperm injection" OR ICSI OR (sperm W/3 injection)) | 83826          |
| #2            | TITLE-ABS-KEY(anxiety* OR depression* OR emotion* OR distress* OR stress* OR psychosocial OR psychology* OR "emotional stress" OR "mental suffering")                                        | 1596528        |
| #3            | TITLE-ABS-KEY(infertility* OR sterility OR "reproductive sterility" OR subfertility OR "sub-fertility")                                                                                      | 47033          |
| #4            | #1 AND #2 AND #3                                                                                                                                                                             | 1254           |
| #5            | LIMIT-TO (LANGUAGE, "English")                                                                                                                                                               | 1145           |
| #6            | LIMIT-TO (PUBYEAR > 1999 AND PUBYEAR < 2024)                                                                                                                                                 | 862            |
| #7            | #4 AND #5 AND #6                                                                                                                                                                             | 797            |
| #8            | LIMIT-TO (DOCUMENT TYPE, "Article")                                                                                                                                                          | 1033           |
| #9            | #4 AND #5 AND #6 AND #8                                                                                                                                                                      | 694            |
| #10           | (man AND woman) OR (men AND women)                                                                                                                                                           | 115            |
| #11           | #4 AND #5 AND #6 AND #8 AND #10                                                                                                                                                              | 66             |
